# Supplementary material for: Effect of Associated Bacteria GD1 on the Low-Temperature Adaptability of Bursaphelenchus xylophilus Based on RNA-Seq and RNAi
Source: MDPI journal article supplement (doi:10.3390/microorganisms11020430), 2023-02-08
Supplement: s1 [file s1]

Supplemental Table S1. Transcriptome data filtering statistics

| Sample | Raw Reads | Clean Reads (%)   | Low Quality (%) |
|--------|-----------|-------------------|-----------------|
| CK1    | 50525822  | 50396262 (99.74%) | 118652 (0.23%)  |
| CK2    | 53527442  | 53372122 (99.71%) | 142554 (0.27%)  |
| CK3    | 52847546  | 52700654 (99.72%) | 133906 (0.25%)  |
| CK4    | 51076532  | 50973434 (99.80%) | 90740 (0.18%)   |
| CK5    | 60860946  | 60737646 (99.80%) | 107778 (0.18%)  |
| T1     | 56105106  | 55977398 (99.77%) | 115318 (0.21%)  |
| T2     | 51497628  | 51393102 (99.80%) | 92094 (0.18%)   |
| T3     | 54178930  | 54066848 (99.79%) | 100488 (0.19%)  |
| T4     | 62043684  | 61924146 (99.81%) | 105950 (0.17%)  |
| T5     | 49375848  | 49269334 (99.78%) | 94082 (0.19%)   |

Supplemental Table S2. Base mass analysis

| Sample | Raw Date (bp) | Clean Date (bp) | GC (%) | Q30 (%) |
|--------|---------------|-----------------|--------|---------|
| CK1    | 7578873300    | 7558731199      | 47.97% | 94.45%  |
| CK2    | 8029116300    | 8005009127      | 47.87% | 94.38%  |
| CK3    | 7927131900    | 7904302467      | 47.88% | 94.46%  |
| CK4    | 7661479800    | 7645238033      | 47.83% | 94.63%  |
| CK5    | 9129141900    | 9109735921      | 47.89% | 94.67%  |
| T1     | 8415765900    | 8395816641      | 47.84% | 94.64%  |
| T2     | 7724644200    | 7708173716      | 47.89% | 94.83%  |
| T3     | 8126839500    | 8109219077      | 47.87% | 94.44%  |
| T4     | 9306552600    | 9287718767      | 47.59% | 94.84%  |
| T5     | 7406377200    | 7389614741      | 47.87% | 94.53%  |

Supplemental Table S3. Ribosome alignment results

| Sample | Clean Reads | Mapped Reads (%) | Unmapped Reads (%) |
|--------|-------------|------------------|--------------------|
| CK1    | 50396262    | 48218 (0.10%)    | 50348044 (99.90%)  |
| CK2    | 53372122    | 43128 (0.08%)    | 53328994 (99.92%)  |
| CK3    | 52700654    | 40810 (0.08%)    | 52659844 (99.92%)  |
| CK4    | 50973434    | 36350 (0.07%)    | 50937084 (99.93%)  |
| CK5    | 60737646    | 39892 (0.07%)    | 60697754 (99.93%)  |
| T1     | 55977398    | 30198 (0.05%)    | 55947200 (99.95%)  |
| T2     | 51393102    | 40406 (0.08%)    | 51352696 (99.92%)  |
| T3     | 54066848    | 40926 (0.08%)    | 54025922 (99.92%)  |
| T4     | 61924146    | 59926 (0.10%)    | 61864220 (99.90%)  |
| T5     | 49269334    | 44794 (0.09%)    | 49224540 (99.91%)  |

Supplemental Table S4. Refer to the Genome Alignment Statistics

| Sample | Clean Reads | Unique Mapped (%) | Multiple Mapped (%) |
|--------|-------------|-------------------|---------------------|
| CK1    | 50396262    | 45791458 (90.95%) | 520144 (1.03%)      |
| CK2    | 53372122    | 48360903 (90.68%) | 557124 (1.04%)      |
| CK3    | 52700654    | 47889853 (90.94%) | 533498 (1.01%)      |
| CK4    | 50973434    | 46268443 (90.83%) | 520664 (1.02%)      |
| CK5    | 60737646    | 55415214 (91.30%) | 627207 (1.03%)      |
| T1     | 55977398    | 51019536 (91.19%) | 580856 (1.04%)      |
| T2     | 51393102    | 46863898 (91.26%) | 540435 (1.05%)      |
| T3     | 54066848    | 49205979 (91.08%) | 550834 (1.02%)      |
| T4     | 61924146    | 56440823 (91.23%) | 633098 (1.02%)      |
| T5     | 49269334    | 44917040 (91.25%) | 500235 (1.02%)      |

Supplemental Table S5. Genetic testing statistics

| Sample | Refer Genes (%) | Novel Genes (%) | Total Genes (%) |
|--------|-----------------|-----------------|-----------------|
| All    | 16082 (90.84%)  | 316 (100.00%)   | 16398 (91.00%)  |
| CK1    | 14972 (84.57%)  | 289 (91.46%)    | 15261 (84.69%)  |
| CK2    | 14996 (84.70%)  | 289 (91.46%)    | 15285 (84.82%)  |
| CK3    | 15013 (84.80%)  | 290 (91.77%)    | 15303 (84.92%)  |
| CK4    | 14969 (84.55%)  | 289 (91.46%)    | 15258 (84.67%)  |
| CK5    | 15272 (86.26%)  | 294 (93.04%)    | 15566 (86.38%)  |
| T1     | 15045 (84.98%)  | 292 (92.41%)    | 15337 (85.11%)  |
| T2     | 15088 (85.22%)  | 294 (93.04%)    | 15382 (85.36%)  |
| T3     | 14972 (84.57%)  | 291 (92.09%)    | 15263 (84.70%)  |
| T4     | 15228 (86.01%)  | 300 (94.94%)    | 15528 (86.17%)  |
| T5     | 15009 (84.78%)  | 284 (89.87%)    | 15293 (84.87%)  |

Supplemental Tables S6. KEGG pathway and pathway ID

| NO. | Pathway                                     | Pathway ID |
|-----|---------------------------------------------|------------|
| 1   | Transcriptional misregulation in cancers    | ko05202    |
| 2   | EGFR tyrosine kinase inhibitor resistance   | ko01521    |
| 3   | MAPK signaling pathway                      | ko04010    |
| 4   | Apoptosis - fly                             | ko04214    |
| 5   | Mucin type O-glycan biosynthesis            | ko00512    |
| 6   | Sphingolipid signaling pathway              | ko04071    |
| 7   | Alanine, aspartate and glutamate metabolism | ko00250    |
| 8   | Nitrogen metabolism                         | ko00910    |

---

|    |                                                            |         |
|----|------------------------------------------------------------|---------|
| 9  | Apoptosis                                                  | ko04210 |
| 10 | Valine, leucine and isoleucine biosynthesis                | ko00290 |
| 11 | PI3K-Akt signaling pathway                                 | ko04151 |
| 12 | Protein digestion and absorption                           | ko04974 |
| 13 | Renal cell carcinoma                                       | ko05211 |
| 14 | Neurotrophin signaling pathway                             | ko04722 |
| 15 | D-Glutamine and D-glutamate metabolism                     | ko00471 |
| 16 | Dorso-ventral axis formation                               | ko04320 |
| 17 | Glycosphingolipid biosynthesis - lacto and neolacto series | ko00601 |
| 18 | Riboflavin metabolism                                      | ko00740 |
| 19 | Arachidonic acid metabolism                                | ko00590 |
| 20 | MicroRNAs in cancer                                        | ko05206 |
| 21 | Thiamine metabolism                                        | ko00730 |
| 22 | Tight junction                                             | ko04530 |
| 23 | Vasopressin-regulated water reabsorption                   | ko04962 |
| 24 | HIF-1 signaling pathway                                    | ko04066 |
| 25 | Taurine and hypotaurine metabolism                         | ko00430 |
| 26 | Glutathione metabolism                                     | ko00480 |
| 27 | mTOR signaling pathway                                     | ko04150 |
| 28 | Proximal tubule bicarbonate reclamation                    | ko04964 |
| 29 | Biosynthesis of amino acids                                | ko01230 |
| 30 | Long-term depression                                       | ko04730 |
| 31 | Lysosome                                                   | ko04142 |
| 32 | Gap junction                                               | ko04540 |
| 33 | Insulin signaling pathway                                  | ko04910 |
| 34 | MAPK signaling pathway - fly                               | ko04013 |
| 35 | Prostate cancer                                            | ko05215 |
| 36 | Huntington disease                                         | ko05016 |
| 37 | Rap1 signaling pathway                                     | ko04015 |
| 38 | Pancreatic secretion                                       | ko04972 |
| 39 | Focal adhesion                                             | ko04510 |
| 40 | Regulation of actin cytoskeleton                           | ko04810 |
| 41 | Maturity onset diabetes of the young                       | ko04950 |
| 42 | Longevity regulating pathway - mammal                      | ko04211 |
| 43 | Pancreatic cancer                                          | ko05212 |
| 44 | Hippo signaling pathway - multiple species                 | ko04392 |
| 45 | Circadian rhythm                                           | ko04710 |
| 46 | Chemical carcinogenesis                                    | ko05204 |
| 47 | Metabolic pathways                                         | ko01100 |
| 48 | Tyrosine metabolism                                        | ko00350 |
| 49 | Gastric cancer                                             | ko05226 |
| 50 | Cell cycle                                                 | ko04110 |
| 51 | Hedgehog signaling pathway - fly                           | ko04341 |
| 52 | Arginine biosynthesis                                      | ko00220 |

---

---

|    |                                                     |         |
|----|-----------------------------------------------------|---------|
| 53 | One carbon pool by folate                           | ko00670 |
| 54 | Spinocerebellar ataxia                              | ko05017 |
| 55 | Progesterone-mediated oocyte maturation             | ko04914 |
| 56 | Cytosolic DNA-sensing pathway                       | ko04623 |
| 57 | Thyroid cancer                                      | ko05216 |
| 58 | Central carbon metabolism in cancer                 | ko05230 |
| 59 | mRNA surveillance pathway                           | ko03015 |
| 60 | Drug metabolism - cytochrome P450                   | ko00982 |
| 61 | Steroid biosynthesis                                | ko00100 |
| 62 | Folate biosynthesis                                 | ko00790 |
| 63 | Vascular smooth muscle contraction                  | ko04270 |
| 64 | Non-alcoholic fatty liver disease (NAFLD)           | ko04932 |
| 65 | Parathyroid hormone synthesis, secretion and action | ko04928 |
| 66 | Purine metabolism                                   | ko00230 |
| 67 | Metabolism of xenobiotics by cytochrome P450        | ko00980 |
| 68 | Oocyte meiosis                                      | ko04114 |
| 69 | Fatty acid biosynthesis                             | ko00061 |
| 70 | Antifolate resistance                               | ko01523 |
| 71 | ECM-receptor interaction                            | ko04512 |
| 72 | IL-17 signaling pathway                             | ko04657 |
| 73 | Bladder cancer                                      | ko05219 |
| 74 | ABC transporters                                    | ko02010 |
| 75 | Renin-angiotensin system                            | ko04614 |
| 76 | Axon regeneration                                   | ko04361 |
| 77 | Acute myeloid leukemia                              | ko05221 |
| 78 | Long-term potentiation                              | ko04720 |
| 79 | Estrogen signaling pathway                          | ko04915 |
| 80 | Human papillomavirus infection                      | ko05165 |
| 81 | Autophagy - other eukaryotes                        | ko04136 |
| 82 | Autophagy - animal                                  | ko04140 |
| 83 | Melanoma                                            | ko05218 |
| 84 | Chemokine signaling pathway                         | ko04062 |
| 85 | Herpes simplex infection                            | ko05168 |
| 86 | Tuberculosis                                        | ko05152 |
| 87 | Carbohydrate digestion and absorption               | ko04973 |
| 88 | Glycine, serine and threonine metabolism            | ko00260 |
| 89 | RNA polymerase                                      | ko03020 |
| 90 | Hematopoietic cell lineage                          | ko04640 |
| 91 | Natural killer cell mediated cytotoxicity           | ko04650 |
| 92 | Salivary secretion                                  | ko04970 |
| 93 | Mineral absorption                                  | ko04978 |
| 94 | Adrenergic signaling in cardiomyocytes              | ko04261 |
| 95 | Ascorbate and aldarate metabolism                   | ko00053 |
| 96 | Axon guidance                                       | ko04360 |

---

---

|     |                                                     |         |
|-----|-----------------------------------------------------|---------|
| 97  | GnRH signaling pathway                              | ko04912 |
| 98  | Ubiquinone and other terpenoid-quinone biosynthesis | ko00130 |
| 99  | Other types of O-glycan biosynthesis                | ko00514 |
| 100 | Oxytocin signaling pathway                          | ko04921 |
| 101 | Basal transcription factors                         | ko03022 |
| 102 | VEGF signaling pathway                              | ko04370 |
| 103 | cGMP - PKG signaling pathway                        | ko04022 |
| 104 | Platelet activation                                 | ko04611 |
| 105 | Aldosterone-regulated sodium reabsorption           | ko04960 |
| 106 | Small cell lung cancer                              | ko05222 |
| 107 | Bile secretion                                      | ko04976 |
| 108 | Cholesterol metabolism                              | ko04979 |
| 109 | Alcoholism                                          | ko05034 |
| 110 | Pathways in cancer                                  | ko05200 |
| 111 | Alzheimer disease                                   | ko05010 |
| 112 | Lysine degradation                                  | ko00310 |
| 113 | GABAergic synapse                                   | ko04727 |
| 114 | TNF signaling pathway                               | ko04668 |
| 115 | Systemic lupus erythematosus                        | ko05322 |
| 116 | Amyotrophic lateral sclerosis (ALS)                 | ko05014 |
| 117 | Shigellosis                                         | ko05131 |
| 118 | Ubiquitin mediated proteolysis                      | ko04120 |
| 119 | Chronic myeloid leukemia                            | ko05220 |
| 120 | Non-small cell lung cancer                          | ko05223 |
| 121 | Hippo signaling pathway -fly                        | ko04391 |
| 122 | Proteoglycans in cancer                             | ko05205 |
| 123 | Leukocyte transendothelial migration                | ko04670 |
| 124 | Glycolysis / Gluconeogenesis                        | ko00010 |
| 125 | Nucleotide excision repair                          | ko03420 |
| 126 | TGF-beta signaling pathway                          | ko04350 |
| 127 | Synaptic vesicle cycle                              | ko04721 |
| 128 | cAMP signaling pathway                              | ko04024 |
| 129 | Inositol phosphate metabolism                       | ko00562 |
| 130 | Glyoxylate and dicarboxylate metabolism             | ko00630 |
| 131 | Propanoate metabolism                               | ko00640 |
| 132 | Endometrial cancer                                  | ko05213 |
| 133 | Pentose and glucuronate interconversions            | ko00040 |
| 134 | Wnt signaling pathway                               | ko04310 |
| 135 | Adherens junction                                   | ko04520 |
| 136 | Hippo signaling pathway                             | ko04390 |
| 137 | Pathogenic Escherichia coli infection               | ko05130 |
| 138 | Sphingolipid metabolism                             | ko00600 |
| 139 | Endocrine resistance                                | ko01522 |
| 140 | Bacterial invasion of epithelial cells              | ko05100 |

---

---

|     |                                                            |         |
|-----|------------------------------------------------------------|---------|
| 141 | Ras signaling pathway                                      | ko04014 |
| 142 | Fluid shear stress and atherosclerosis                     | ko05418 |
| 143 | Fatty acid elongation                                      | ko00062 |
| 144 | Aminoacyl-tRNA biosynthesis                                | ko00970 |
| 145 | T cell receptor signaling pathway                          | ko04660 |
| 146 | AGE-RAGE signaling pathway in diabetic complications       | ko04933 |
| 147 | Hepatitis C                                                | ko05160 |
| 148 | Glioma                                                     | ko05214 |
| 149 | Viral carcinogenesis                                       | ko05203 |
| 150 | Endocrine and other factor-regulated calcium reabsorption  | ko04961 |
| 151 | Thyroid hormone synthesis                                  | ko04918 |
| 152 | Platinum drug resistance                                   | ko01524 |
| 153 | RNA transport                                              | ko03013 |
| 154 | Retinol metabolism                                         | ko00830 |
| 155 | Dopaminergic synapse                                       | ko04728 |
| 156 | Pyruvate metabolism                                        | ko00620 |
| 157 | Fc gamma R-mediated phagocytosis                           | ko04666 |
| 158 | Hedgehog signaling pathway                                 | ko04340 |
| 159 | Gastric acid secretion                                     | ko04971 |
| 160 | Epithelial cell signaling in Helicobacter pylori infection | ko05120 |
| 161 | AMPK signaling pathway                                     | ko04152 |
| 162 | Cardiac muscle contraction                                 | ko04260 |
| 163 | Glutamatergic synapse                                      | ko04724 |
| 164 | ErbB signaling pathway                                     | ko04012 |
| 165 | Renin secretion                                            | ko04924 |
| 166 | Breast cancer                                              | ko05224 |
| 167 | Yersinia infection                                         | ko05135 |
| 168 | Colorectal cancer                                          | ko05210 |
| 169 | Signaling pathways regulating pluripotency of stem cells   | ko04550 |
| 170 | Insulin secretion                                          | ko04911 |
| 171 | Porphyrin and chlorophyll metabolism                       | ko00860 |
| 172 | Carbon metabolism                                          | ko01200 |
| 173 | Phosphatidylinositol signaling system                      | ko04070 |
| 174 | Aldosterone synthesis and secretion                        | ko04925 |
| 175 | Spliceosome                                                | ko03040 |
| 176 | Serotonergic synapse                                       | ko04726 |
| 177 | Hepatitis B                                                | ko05161 |
| 178 | Salmonella infection                                       | ko05132 |
| 179 | Circadian entrainment                                      | ko04713 |
| 180 | Amphetamine addiction                                      | ko05031 |
| 181 | Melanogenesis                                              | ko04916 |
| 182 | Glucagon signaling pathway                                 | ko04922 |
| 183 | Steroid hormone biosynthesis                               | ko00140 |
| 184 | FoxO signaling pathway                                     | ko04068 |

---

---

|     |                                                  |         |
|-----|--------------------------------------------------|---------|
| 185 | Protein processing in endoplasmic reticulum      | ko04141 |
| 186 | Neuroactive ligand-receptor interaction          | ko04080 |
| 187 | Cushing syndrome                                 | ko04934 |
| 188 | Inflammatory mediator regulation of TRP channels | ko04750 |
| 189 | Endocytosis                                      | ko04144 |
| 190 | Glycerophospholipid metabolism                   | ko00564 |
| 191 | Thermogenesis                                    | ko04714 |
| 192 | Glycerolipid metabolism                          | ko00561 |
| 193 | Choline metabolism in cancer                     | ko05231 |
| 194 | Thyroid hormone signaling pathway                | ko04919 |
| 195 | Fatty acid metabolism                            | ko01212 |
| 196 | Insulin resistance                               | ko04931 |
| 197 | Phagosome                                        | ko04145 |
| 198 | Oxidative phosphorylation                        | ko00190 |
| 199 | HTLV-I infection                                 | ko05166 |
| 200 | Cellular senescence                              | ko04218 |
| 201 | Retrograde endocannabinoid signaling             | ko04723 |
| 202 | Hepatocellular carcinoma                         | ko05225 |
| 203 | Parkinson disease                                | ko05012 |
| 204 | Human immunodeficiency virus 1 infection         | ko05170 |
| 205 | Peroxisome                                       | ko04146 |
| 206 | Drug metabolism - other enzymes                  | ko00983 |
| 207 | Ribosome                                         | ko03010 |

---

Supplemental Table S7. Sequences of the primers used in this study

| Primer      | Sequence (5' → 3')                               |
|-------------|--------------------------------------------------|
| q_0171500_F | CTTGTGGTCTTTGCAACCCG                             |
| q_0171500_R | TTTGCAAACGCAGCGATGG                              |
| q_1454800_F | CCAGTCACCGAAGAGCCAAT                             |
| q_1454800_R | CGGTCACTTCCTCAGGGTTG                             |
| q_1389600_F | TTGTCGCCTCGGATTGTGAA                             |
| q_1389600_R | GCGACACAGATCCCACATGA                             |
| q_0345700_F | GGGTTTCTACCTTCGGATTGT                            |
| q_0345700_R | GGTCTTCCCACATAGGCTTAAT                           |
| q_0802300_F | ACGCGACAGCTCAAGAAA                               |
| q_0802300_R | TCGAACTCAACAAACGCAAAG                            |
| q_1604100_F | GCGGAATGCGAGAAAGAATTTA                           |
| q_1604100_R | CCGTGTGCCAAATGTTTCATAG                           |
| q_0370100_F | GCAGAAATGGTGCAGCTAATG                            |
| q_0370100_R | TGTTTCATGCTCTCCTCACAAA                           |
| q_1348900_F | GACGTGAACACCTTCGATGA                             |
| q_1348900_R | TGCCCATTGTGCTCCATA                               |
| q_0845700_F | CAGGAAGTGCTGGGAAAGTAT                            |
| q_0845700_R | GTCGATGGAGTTGGCTATGATTA                          |
| q_0662700_F | GGTGTTGAAGGAGAAGGAAGAG                           |
| q_0662700_R | GGAATCAGATGAACCGGAGATT                           |
| q_daf-11_F  | GACTTACTGGCTTGATGGGATAG                          |
| q_daf-11_R  | CCTCGCGTCTTCTGGTATTG                             |
| Actin_F     | GCAACACGGAGTTCGTTGTA                             |
| Actin_R     | GTATCGTCACCAACTGGGAT                             |
| daf-11_F    | CCAAAGGAAGAATACGCC                               |
| daf-11_R    | ATTTTATTGCCCTTCTCG                               |
| M13F        | GTAAAACGACGGCCAGT                                |
| M13R        | CAGGAAACAGCTATGAC                                |
| ds_daf-11_1 | GATCACTAATACGACTCACTATAGGGGCAGCACAACAATCGTTTATT  |
| ds_daf-11_2 | AATAAACGATTGTTGTGCTGCCCCCTATAGTGAGTCGTATTAGTGATC |
| ds_daf-11_3 | AAGCAGCACAACAATCGTTTACCCTATAGTGAGTCGTATTAGTGATC  |
| ds_daf-11_4 | GATCACTAATACGACTCACTATAGGGTAAACGATTGTTGTGCTGCTT  |
| ds_gfp_1    | GATCACTAATACGACTCACTATAGGGGGGATGTCTCACATCTTGTTT  |
| ds_gfp_2    | AAACAAGATGTGAGACATCCCCCTATAGTGAGTCGTATTAGTGATC   |
| ds_gfp_3    | AAGGGATGTCTCACATCTTGTCCTATAGTGAGTCGTATTAGTGATC   |
| ds_gfp_4    | GATCACTAATACGACTCACTATAGGGACAAGATGTGAGACATCCCTT  |
